# Supplementary material for: Human embryonic stem cells contribute to embryonic and extraembryonic lineages in mouse embryos upon inhibition of apoptosis
Source: PubMed Central journal article supplement (PMC5752840; doi:10.1038/cr.2017.138), 2017-11-03
Supplement: cr2017138x2.pdf [file cr2017138x2.pdf]

**Table S1. Summary of chimera formation efficiency of the *BCL2L1*- and *BCL2*-overexpression hESCs in pre-implantation mouse embryos.**

| Donor cell lines | No. of injected embryos | DOX treatment |                | Chimeric embryos developed <i>in vitro</i> |                                     |
|------------------|-------------------------|---------------|----------------|--------------------------------------------|-------------------------------------|
|                  |                         | Cell culture  | Embryo culture | No. of blastocysts (%)                     | No. of GFP-positive blastocysts (%) |
| BCL2L1-1         | 54                      | +             | +              | 46 (85.2)                                  | 46 (100.0)                          |
| BCL2L1-2         | 35                      | +             | +              | 30 (85.7)                                  | 26 (86.7)                           |
| BCL2-1           | 55                      | +             | +              | 33 (62.3)                                  | 30 (90.9)                           |
| BCL2-3           | 62                      | +             | +              | 53 (85.5)                                  | 50 (94.3)                           |
| Control-1*       | 27                      | +             | -              | 22 (81.5)                                  | 12 (54.5)                           |
| Control-2*       | 35                      | -             | -              | 15 (42.9)                                  | 2 (13.3)                            |

\* BCL2L1-1 hESCs were used as control.

**Table S2. Primers used in the study.**

| primer name          | 5'-primer sequence-3'                             |                                                                |                   |
|----------------------|---------------------------------------------------|----------------------------------------------------------------|-------------------|
| <i>NEO-F</i>         | AAGATGGATTGCACGCAGGTTCTCC                         | Identification of<br>virus integration                         |                   |
| <i>NEO-R</i>         | AAGAAGGCGATAGAAGGCGATGCGC                         |                                                                |                   |
| <i>BCL2-F</i>        | ATCCAGCCTCCGCGGCCCGGCCACCATGGCGCACGCTGGGAGAACAGG  | <i>BCL2/BCL2L1</i><br>overexpression<br>vector<br>construction |                   |
| <i>BCL2-R</i>        | TTTGTTTGACCTTGTGGCCAGATAGGCACCC                   |                                                                |                   |
| <i>BCL2-IRES-F</i>   | GTGCCTATCTGGGCCACAAGGTCAAACAACTCTTAACTTTGATT      |                                                                |                   |
| <i>BCL2-IRES-R</i>   | TATCGATAAGCTTGATATCGAATTTTGTAAATCCAGAGGTTGATTGTCG |                                                                |                   |
| <i>BCL2L1-F</i>      | GCCTCCGCGGCCCGGCCACCATGTCTCAGAGCAACCGGGAGCTGG     |                                                                |                   |
| <i>BCL2L1-R</i>      | TTTCCGACTGAAGAGTGAGCCCAGC                         |                                                                |                   |
| <i>BCL2L1-IRES-F</i> | CTCTTCAGTCGGAAAGTCAAACAACTCTTAACTTTGATT           |                                                                |                   |
| <i>BCL2L1-IRES-R</i> | ATAAGCTTGATATCGAATTTTGTAAATCCAGAGGTTGATTGTCG      |                                                                |                   |
| <i>AAVS1-sgRNA-F</i> | CACCGGGGCCACTAGGGACAGGAT                          |                                                                | sgRNA<br>sequence |
| <i>AAVS1-sgRNA-R</i> | AAACATCCTGTCCCTAGTGGCCCC                          |                                                                |                   |
| hMitochondria-F      | AATATTAACACAACTACCACCTACCT                        | Human cell<br>contribution                                     |                   |
| hMitochondria-R      | TGGTTCTCAGGGTTTGTATAA                             |                                                                |                   |

|                 |                         |               |
|-----------------|-------------------------|---------------|
| <i>UCNE-F</i>   | AACAATGGGTTTCAGCTGCTT   | assay         |
| <i>UCNE-R</i>   | CCCAGGCGTATTTTTGTTCT    |               |
| <i>OCT4-F</i>   | CTTGAATCCCGAATGGAAAGGG  | Real-time PCR |
| <i>OCT4-R</i>   | GTGTATATCCCAGGGTGATCCTC |               |
| <i>NANOG-F</i>  | TTTGTGGGCCTGAAGAAACT    |               |
| <i>NANOG-R</i>  | AGGGCTGTCCTGAATAAGCAG   |               |
| <i>SOX2-F</i>   | GCCGAGTGGAACTTTTGTCG    |               |
| <i>SOX2-R</i>   | GGCAGCGTGTACTTATCCTTCT  |               |
| <i>SOX17-F</i>  | GTGGACCGCACGGAATTTG     |               |
| <i>SOX17-R</i>  | GGAGATTCACACCGGAGTCA    |               |
| <i>CXCR4-F</i>  | ACTACACCGAGGAAATGGGCT   |               |
| <i>CXCR4-R</i>  | CCCACAATGCCAGTTAAGAAGA  |               |
| <i>T-F</i>      | TATGAGCCTCGAATCCACATAGT |               |
| <i>T-R</i>      | CCTCGTTCTGATAAGCAGTCAC  |               |
| <i>PDGFRA-F</i> | TGGCAGTACCCCATGTCTGAA   |               |
| <i>PDGFRA-R</i> | CCAAGACCGTCACAAAAGGC    |               |

|               |                       |  |
|---------------|-----------------------|--|
| <i>SOX1-F</i> | CAGTACAGCCCCATCTCCAAC |  |
| <i>SOX1-R</i> | GCGGGCAAGTACATGCTGA   |  |
| <i>PAX6-F</i> | TGGGCAGGTATTACGAGACTG |  |
| <i>PAX6-R</i> | ACTCCCGCTTATACTGGGCTA |  |
